# Supplementary material for: Nitrogen-doped porous carbons derived from isomeric metal azolate frameworks
Source: Royal Society of Chemistry journal article supplement (doi:10.1039/c7ta06996k), 2017-01-01
Supplement: c7ta06996k1.pdf [file c7ta06996k1.pdf]

## **Electronic Supplementary Information (ESI) for**

# **Nitrogen-doped porous carbons derived from isomeric metal azolate frameworks**

Xue-Wen Zhang, Lu Jiang, Zong-Wen Mo, Hao-Long Zhou, Pei-Qin Liao, Jia-Wen Ye, Dong-Dong Zhou,\* and Jie-Peng Zhang\*

*MOE Key Laboratory of Bioinorganic and Synthetic Chemistry, School of Chemistry, Sun Yat-Sen University, Guangzhou 510275, China*

\*E-mail: zhoudd3@mail.sysu.edu.cn; zhangjp7@mail.sysu.edu.cn

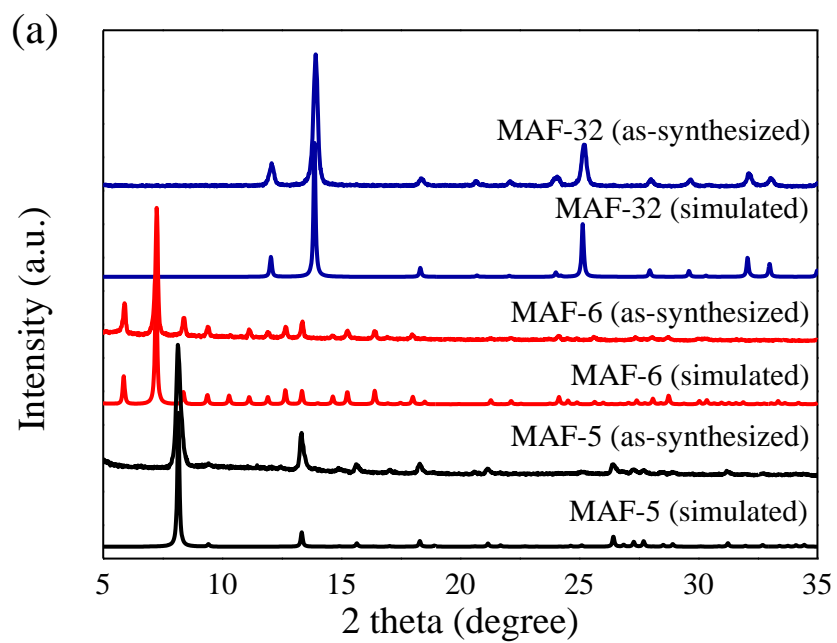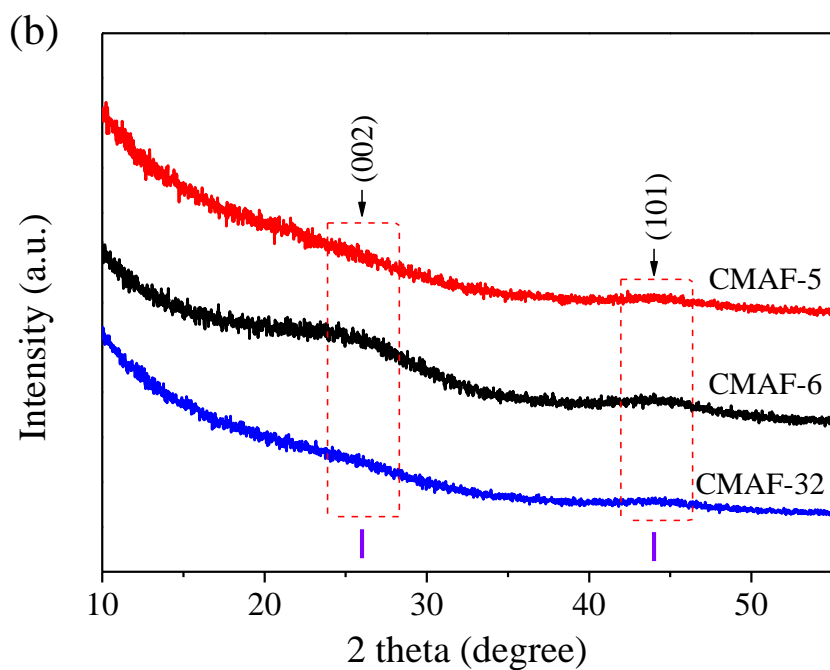

**Fig. S1** (a) The experimental and simulated PXRD patterns of MAF-5, MAF-6 and MAF-32 and (b) PXRD patterns of CMAF-5, CMAF-6 and CMAF-32.

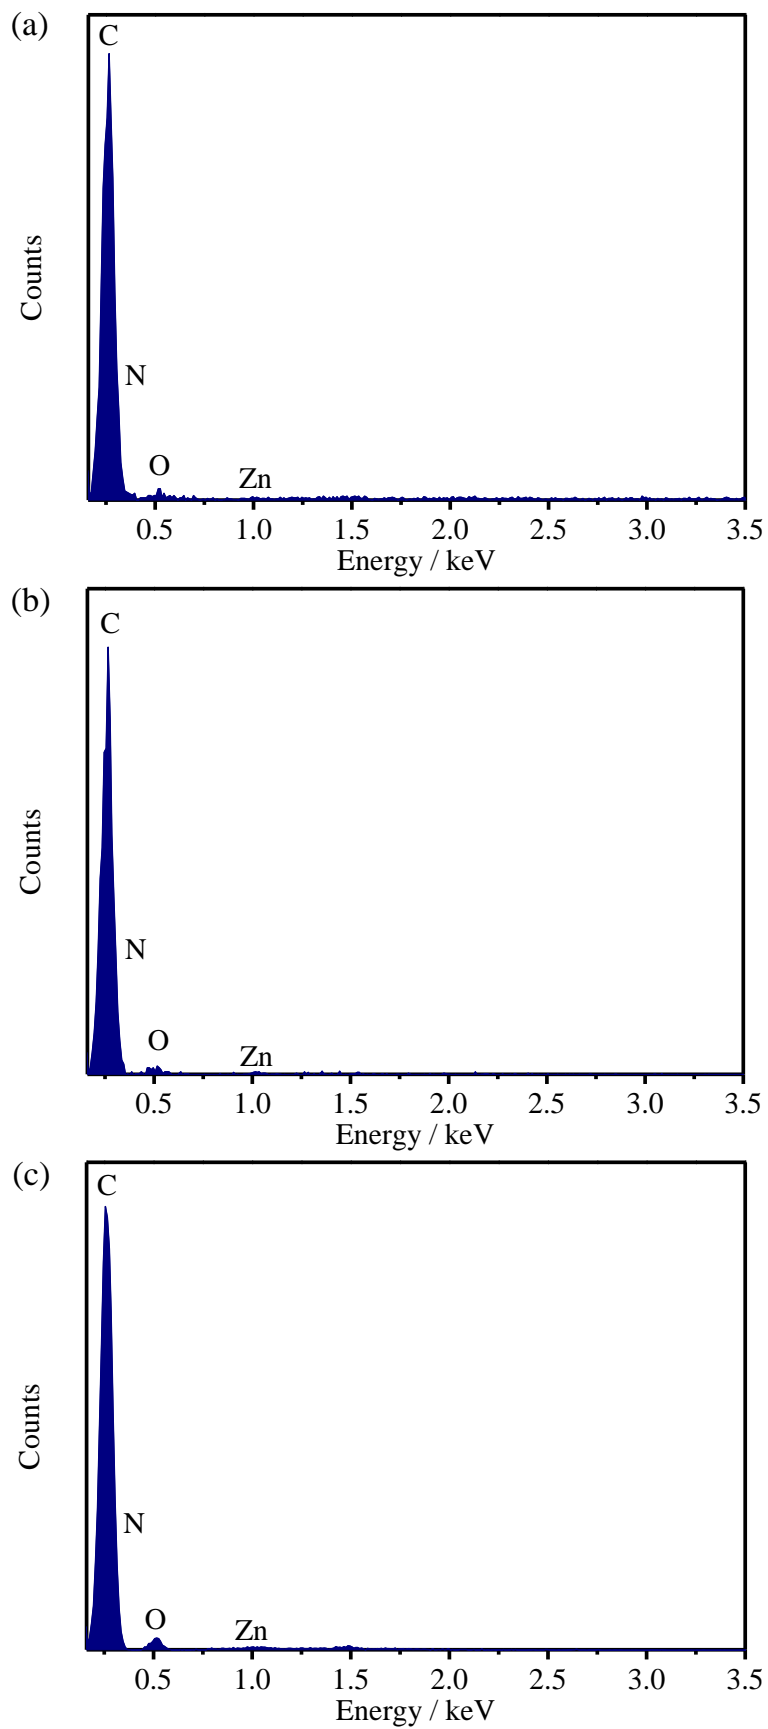

**Fig. S2** EDS analyses of (a) CMAF-5, (b) CMAF-6, and (c) CMAF-32, respectively.

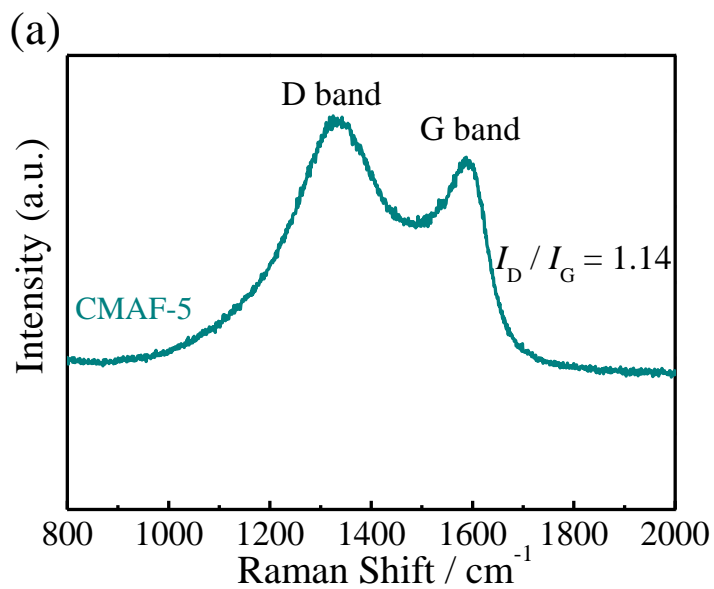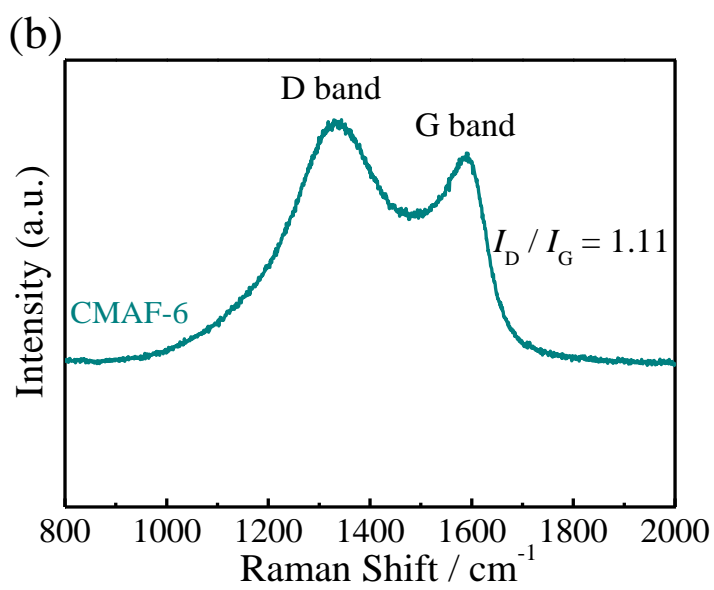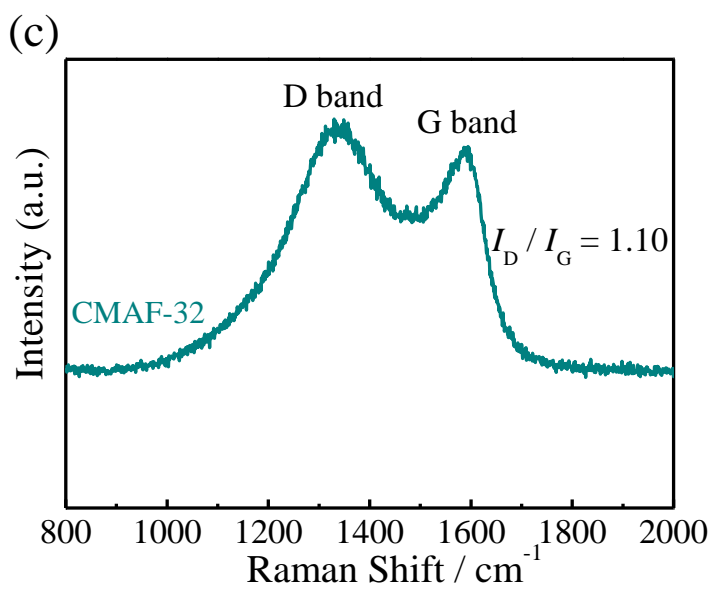

**Fig. S3** Raman spectra of (a) CMAF-5, (b) CMAF-6 and (c) CMAF-32.

Table S1. Comparison of CO<sub>2</sub> adsorption performances of CMAF-5, CMAF-6 and CMAF-32 with other reported porous carbon materials derived from MOF or organic precursors.

|                          | CO <sub>2</sub> (mmol g <sup>-1</sup> ) |              | N content<br>(wt %) | $\Delta H$<br>(kJ mol <sup>-1</sup> ) | $S_{\text{CO}_2/\text{N}_2}$<br>(IAST) | Ref.                      |
|--------------------------|-----------------------------------------|--------------|---------------------|---------------------------------------|----------------------------------------|---------------------------|
|                          | 273 K, 1 bar                            | 298 K, 1 bar |                     |                                       |                                        |                           |
| CMAF-5 <sup>a</sup>      | 4.98                                    | 3.39         | 5.05                | 50.6                                  | 180                                    | <a href="#">This work</a> |
| CMAF-6 <sup>a</sup>      | 5.58                                    | 3.53         | 2.55                | 41.2                                  | 37                                     | <a href="#">This work</a> |
| CMAF-32 <sup>a</sup>     | 4.42                                    | 3.26         | 5.45                | 56.1                                  | 262                                    | <a href="#">This work</a> |
| AAC-2W                   | 6.5                                     | 4.8          | 0                   | 19.1                                  | 11                                     | S1                        |
| NC800                    | 5.7                                     | 3.8          | 14.8                | 26                                    | /                                      | S2                        |
| nZDC-700                 | 5.12                                    | 3.51         | /                   | ~36.5                                 | 79                                     | S3                        |
| NC900                    | 5.1                                     | 3.9          | 2.7                 | ~30                                   | /                                      | S4                        |
| M5-1000 <sup>a</sup>     | 5.00                                    | 3.13         | 0                   | 28.1                                  | 22                                     | S5                        |
| B100-1000 <sup>a</sup>   | 4.80                                    | 2.69         | 0                   | 33.9                                  | 47                                     | S5                        |
| M177-1000 <sup>a</sup>   | 4.75                                    | 3.30         | 0                   | 27.6                                  | 20                                     | S5                        |
| KBM-700                  | 4.75                                    | 3.29         | 10.16               | 43                                    | 99.1                                   | S6                        |
| IRMOF-3-800 <sup>a</sup> | 3.99                                    | 2.78         | 7.76                | 29.6                                  | 39                                     | S7                        |
| N-CNS                    | /                                       | 8.7          | 12.6                | 45.51                                 | 163                                    | S8                        |
| SNS2-20-700              | 6.84                                    | 4.48         | 3.83                | 43.0                                  | 69                                     | S9                        |
| MCN/C-600                | 3.05                                    | 2.35         | 24.9                | 26.2                                  | 40                                     | S10                       |
| SU-MAC-500               | 6.03                                    | 4.5          | 5.8                 | 46.0                                  | 39                                     | S11                       |
| H-NMC-2.5-600            | /                                       | 2.8          | 13.10               | /                                     | 35                                     | S12                       |
| NPC-2-600                | 6.35                                    | 4.02         | 5.25                | 33.5                                  | 32                                     | S13                       |
| HCM-DAH-1-800            | 3.3                                     | 2.6          | 4.1                 | 35.9                                  | 30                                     | S14                       |

<sup>a</sup> Synthesized by direct carbonization of MOF precursors.

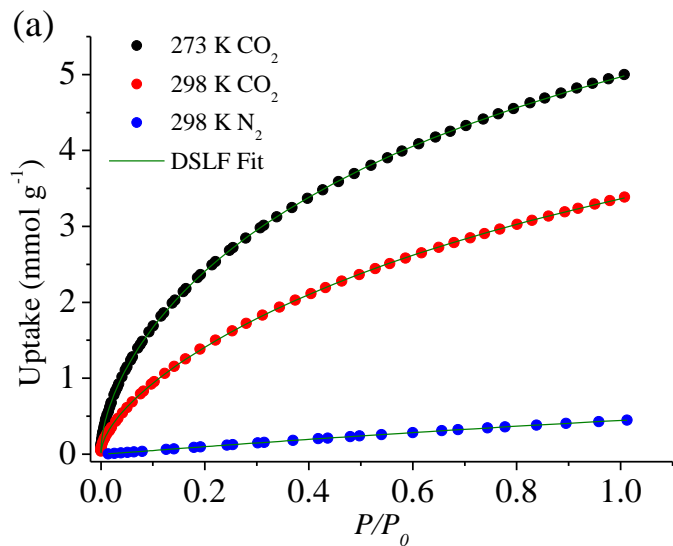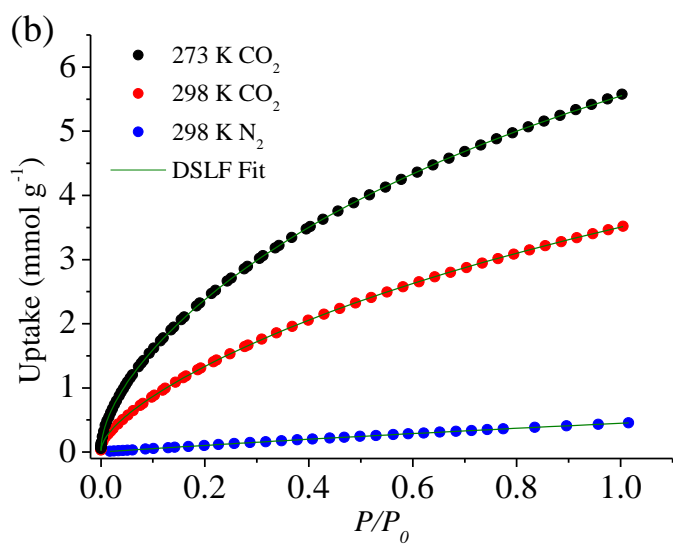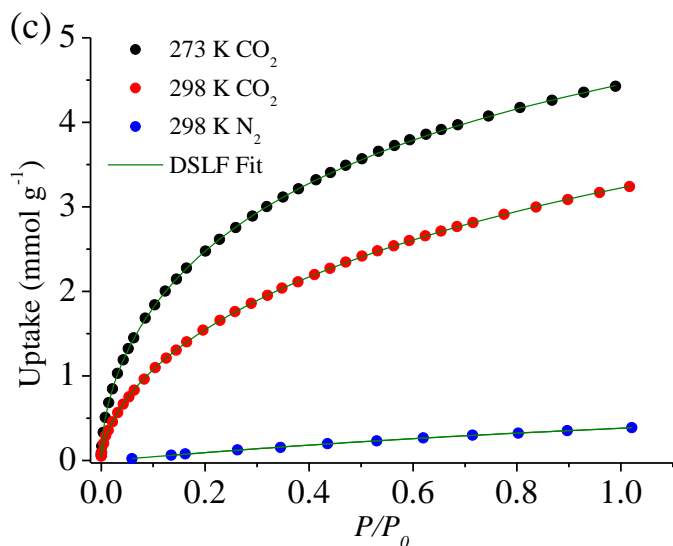

**Fig. S4** CO<sub>2</sub> and N<sub>2</sub> isotherms (symbols) and DSLF fittings (lines) for (a) CMAF-5, (b) CMAF-6 and (c) CMAF-32 at 298 K.

Table S2. DSLF fitting parameters for the CO<sub>2</sub> adsorption isotherms.

|           | CMAF-5 |        | CMAF-6 |        | CMAF-32 |        |
|-----------|--------|--------|--------|--------|---------|--------|
|           | 273 K  | 298 K  | 273 K  | 298 K  | 273 K   | 298 K  |
| $n_{L,A}$ | 8.1606 | 5.5301 | 9.9058 | 6.3533 | 7.3130  | 7.0891 |
| $b_A$     | 0.8918 | 0.4830 | 0.6444 | 0.2594 | 1.1780  | 0.6437 |
| $t_A$     | 1.3056 | 1.8828 | 1.1302 | 2.2027 | 1.5240  | 1.5530 |
| $n_{L,b}$ | 3.0546 | 3.4638 | 3.7806 | 6.4685 | 1.2879  | 5.6859 |
| $b_B$     | 0.5814 | 0.8207 | 0.7882 | 0.5138 | 0.6181  | 0.0858 |
| $t_B$     | 2.5658 | 0.9681 | 2.2262 | 1.0302 | 3.1959  | 2.2513 |

Table S3. DSLF fitting parameters for the N<sub>2</sub> adsorption isotherms.

|           | CMAF-5 | CMAF-6 | CMAF-32 |
|-----------|--------|--------|---------|
| $n_{L,A}$ | 0.6272 | 2.5059 | 0.2288  |
| $b_A$     | 1.1955 | 0.2007 | 0.0513  |
| $t_A$     | 0.8523 | 1.0272 | 0.2373  |
| $n_{L,b}$ | 0.2567 | 1.3024 | 0.7892  |
| $b_B$     | 0.6566 | 0.0235 | 0.8794  |
| $t_B$     | 0.3534 | 0.7588 | 0.8466  |

## Methods for breakthrough measurement and calculation

A stainless-steel column with a length of 10 cm and an internal diameter of 0.46 cm was packed with microcrystalline sample.<sup>S15</sup> The column contained 0.600 g of CMAF-32. The column was connected to the injection and sampling ports by stainless-steel pipes. The column and most parts of the pipelines between the injection and sampling ports were placed in a temperature controlling oven. The flow rates of pure gases were regulated by mass flow controllers. Before breakthrough experiments, the columns were activated by passing He and heated at 393 K for 5 hours, and then cooled to the measurement temperature of 298(2) K. Pure N<sub>2</sub> (0.85 mL(STP) min<sup>-1</sup>) and CO<sub>2</sub> (0.15 mL(STP) min<sup>-1</sup>) were mixed. The gas stream at the outlet of the column was analyzed on line by using a chromatographic analyzer (Agilent 7890A) with a TCD detector and a PLOT/Q column.

The amount of gas  $k$  (such as N<sub>2</sub> or CO<sub>2</sub> in N<sub>2</sub>/CO<sub>2</sub> mixture, or pure He) retained by the breakthrough system can be calculated by:

$$q_k(\tau) = R_k \times \left( \tau - \int_0^\tau f_k(\tau) d\tau \right)$$

where the breakthrough curve for gas  $k$  is expressed by the function  $f_k(\tau)$  and  $R_k$  is the mole fraction of gas  $k$  at the inlet.

When  $\tau$  is large enough ( $\tau \geq \tau_E$ ), we can observe  $f_k(\tau) = R_k$  and  $df_k(\tau)/d\tau = 0$ , meaning that the breakthrough system reaches the equilibrium, and  $q_k(\tau_E)$  is the equilibrium uptake of gas  $k$  in the column.

After reaching equilibrium, the amount of gas  $k$  adsorbed by the adsorbent in the column can be calculated by:

$$Q_K(\tau_E) = q_k(\tau_E) - R_k \times q_{He}(\tau_E)$$

where the  $q_{He}(\tau_E)$  is the retention of He in the column and pipeline.

The selectivity is defined as  $\alpha = (Q_1/y_1)/(Q_2/y_2)$ , where  $Q_i$  is the adsorbed amount of compound  $i$  and  $y_i$  is the mole fraction of compound  $i$  in the gas phases.



## References

- S1 J. Wang, J. Yang, R. Krishna, T. Yang and S. Deng, *J. Mater. Chem. A*, 2016, **4**, 19095-19106.
- S2 A. Aijaz, T. Akita, H. Yang and Q. Xu, *Chem. Commun.*, 2014, **50**, 6498-6501.
- S3 S. Gadipelli and Z. X. Guo, *ChemSusChem*, 2015, **8**, 2123-2132.
- S4 A. Aijaz, N. Fujiwara and Q. Xu, *J. Am. Chem. Soc.*, 2014, **136**, 6790-6793.
- S5 H. R. Kim, T.-U. Yoon, S.-I. Kim, J. An, Y.-S. Bae and C. Y. Lee, *RSC Adv.*, 2017, **7**, 1266-1270.
- S6 Y. Pan, Y. Zhao, S. Mu, Y. Wang, C. Jiang, Q. Liu, Q. Fang, M. Xue and S. Qiu, *J. Mater. Chem. A*, 2017, **5**, 9544-9552.
- S7 S. Ding, Q. Dong, J. Hu, W. Xiao, X. Liu, L. Liao and N. Zhang, *Chem. Commun.*, 2016, **52**, 9757-9760.
- S8 X. Li, Y. Jin, Q. Xue, L. Zhu, W. Xing, H. Zheng and Z. Liu, *J. CO<sub>2</sub> Util.*, 2017, **18**, 275-282.
- S9 Y. K. Kim, G. M. Kim and J. W. Lee, *J. Mater. Chem. A*, 2015, **3**, 10919-10927.
- S10 Q.-F. Deng, L. Liu, X.-Z. Lin, G. Du, Y. Liu and Z.-Y. Yuan, *Chem. Eng. J.*, 2012, **203**, 63-70.
- S11 J. W. F. To, J. He, J. Mei, R. Haghpanah, Z. Chen, T. Kurosawa, S. Chen, W.-G. Bae, L. Pan, J. B. H. Tok, J. Wilcox and Z. Bao, *J. Am. Chem. Soc.*, 2016, **138**, 1001-1009.
- S12 J. Wei, D. Zhou, Z. Sun, Y. Deng, Y. Xia and D. Zhao, *Adv. Funct. Mater.*, 2013, **23**, 2322-2328.
- S13 L. Wan, J. Wang, C. Feng, Y. Sun and K. Li, *Nanoscale*, 2015, **7**, 6534-6544.
- S14 G.-P. Hao, W.-C. Li, D. Qian, G.-H. Wang, W.-P. Zhang, T. Zhang, A.-Q. Wang, F. Schüth, H.-J. Bongard and A.-H. Lu, *J. Am. Chem. Soc.*, 2011, **133**, 11378-11388.
- S15 P.-Q. Liao, H. Chen, D.-D. Zhou, S.-Y. Liu, C.-T. He, Z. Rui, H. Ji, J.-P. Zhang and X.-M. Chen, *Energy Environ. Sci.*, 2015, **8**, 1011-1016.
